# Supplementary material
Source: PubMed Central journal article supplement (PMC1798026)

**Wk 8:** Salivary flow rate  
rAAV2 Administration

**Wk 10-16** (weekly):

- Weight
- Blood glucose levels
- Insulin injections

**Wk 16** (sacrifice):

- Salivary flow rate
- Saliva (VIP)
- Serum (VIP, anti-VIP antibodies, cytokines)
- SMG: protein - VIP, cytokines  
histology - focus scores

Age 8 12 16 wks

• rAAV2LacZ ( $10^{10}$  particles/gland, n = 15)  
• rAAV2hVIP ( $10^{10}$  particles/gland, n = 15)

Mean age of onset autoimmune sialadenitis

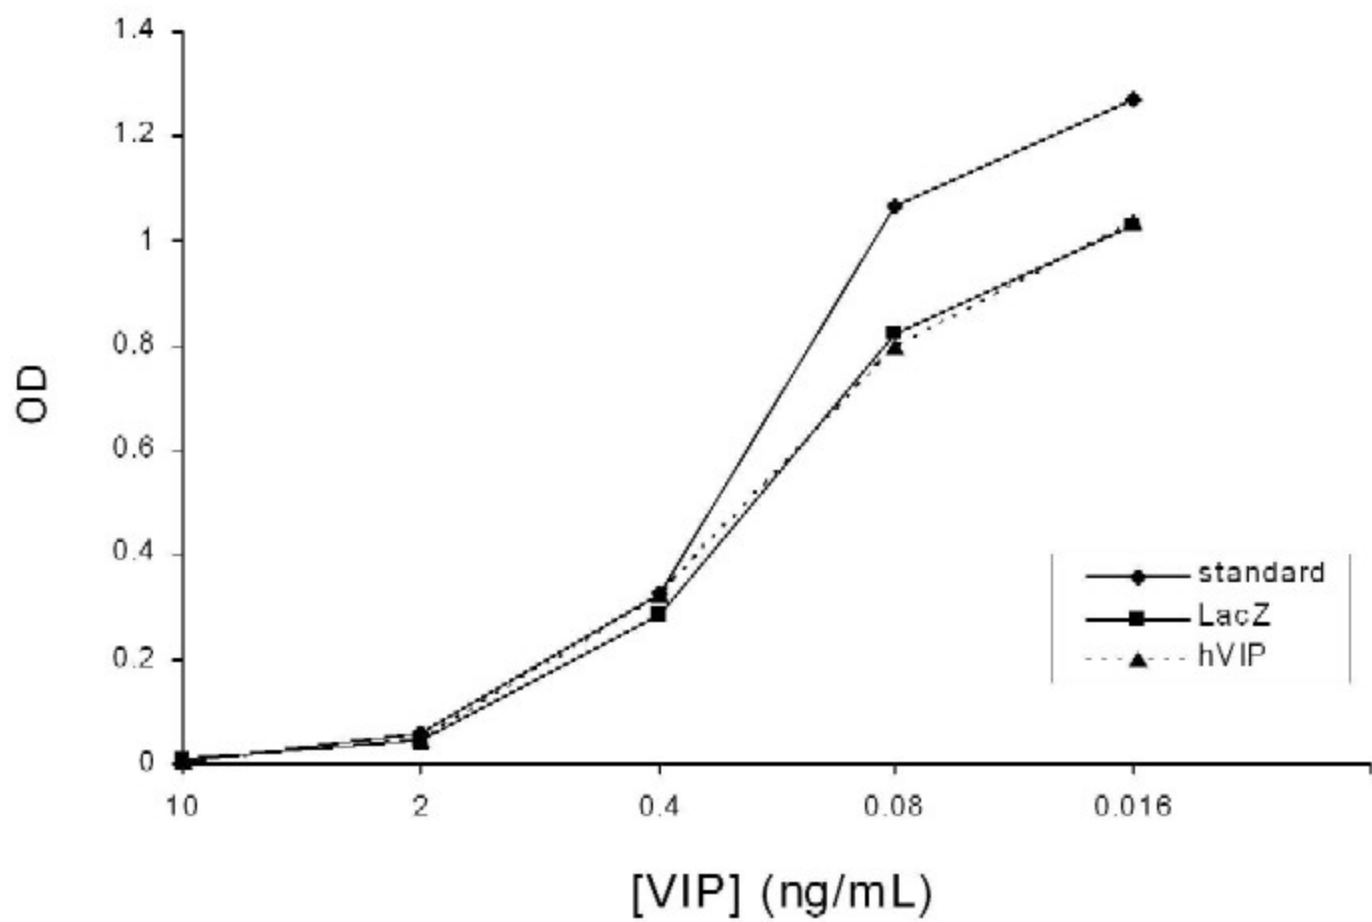

Supplement: annrheumd_ard.2005.038232v2_1.pdf [file annrheumd_ard.2005.038232v2_1.pdf]
